# Supplementary material for: Attitude Control of a Flexible Satellite Using a Neural Network Optimal Controller for the Suppression of the Vibrations
Source: JCI journal article supplement (doi:10.1172/jci.insight.136041), 2003-01-01
Supplement: sd1 [file 1]

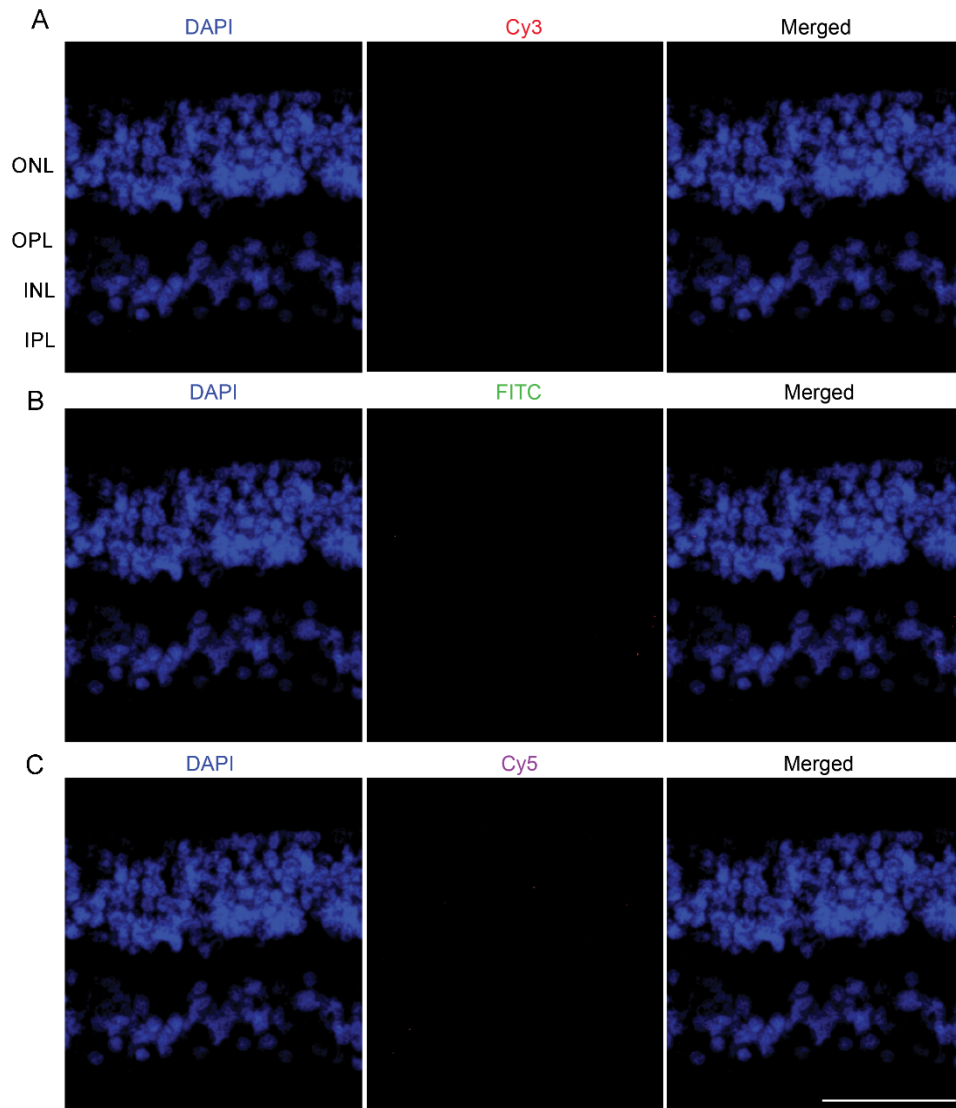

### Supplemental Data

**Supplemental Figure 1. Negative control of RNAscope.** Vertical sections of human retina are processed for validating RNAscope. Nuclei were labelled with 4',6-diamidino-2-phenylindole (DAPI-blue) to identify the nuclear layers of the retina. No-probe with C1 (Cy3), C2 (FITC), or C3 (Cy5) was performed. Merged images showed no labeling of Cy3, FITC, and Cy5. (n=3 retinas) ONL, Outer nuclear layer; OPL, outer plexiform layer; INL, inner nuclear layer; IPL, inner plexiform layer; GCL, ganglion cell layer. Scale bar, 50  $\mu$ m.

Control

WT-ATF6 (Cytosolic)

ATF6[M67V] (Cytosolic)

ATF6-N267\*]

AT6[D28\_T82del] (Cytosolic)

ATF6[I304\_R573del]

250  
130  
100  
70  
55  
35

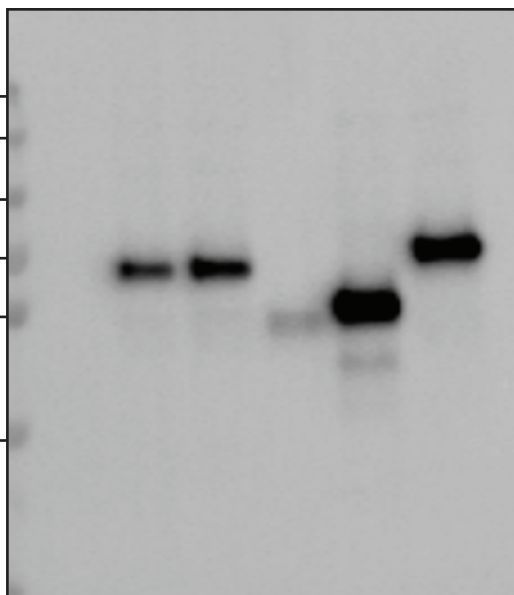

FLAG

250  
130  
100  
70  
55  
35

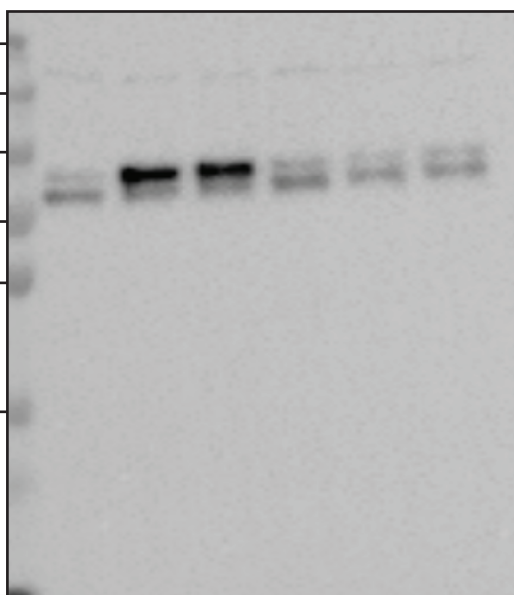

BiP/ GRP78

250  
130  
100  
70  
55

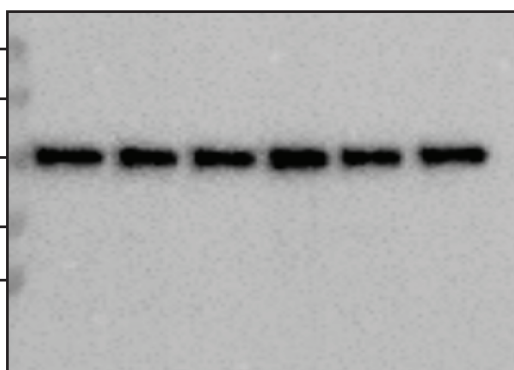

HSP90
